# Supplementary material for: Therapeutic Potential of Gnetin C in Prostate Cancer: A Pre-Clinical Study
Source: PubMed Central journal article supplement (PMC7760540; doi:10.3390/nu12123631), 2020-11-26
Supplement: nutrients-12-03631-s001.pdf [file nutrients-12-03631-s001.pdf]

**Supplementary Data**

K Gadkari *et al* *Therapeutic potential of Gnetin C in prostate cancer: a pre-clinical study*

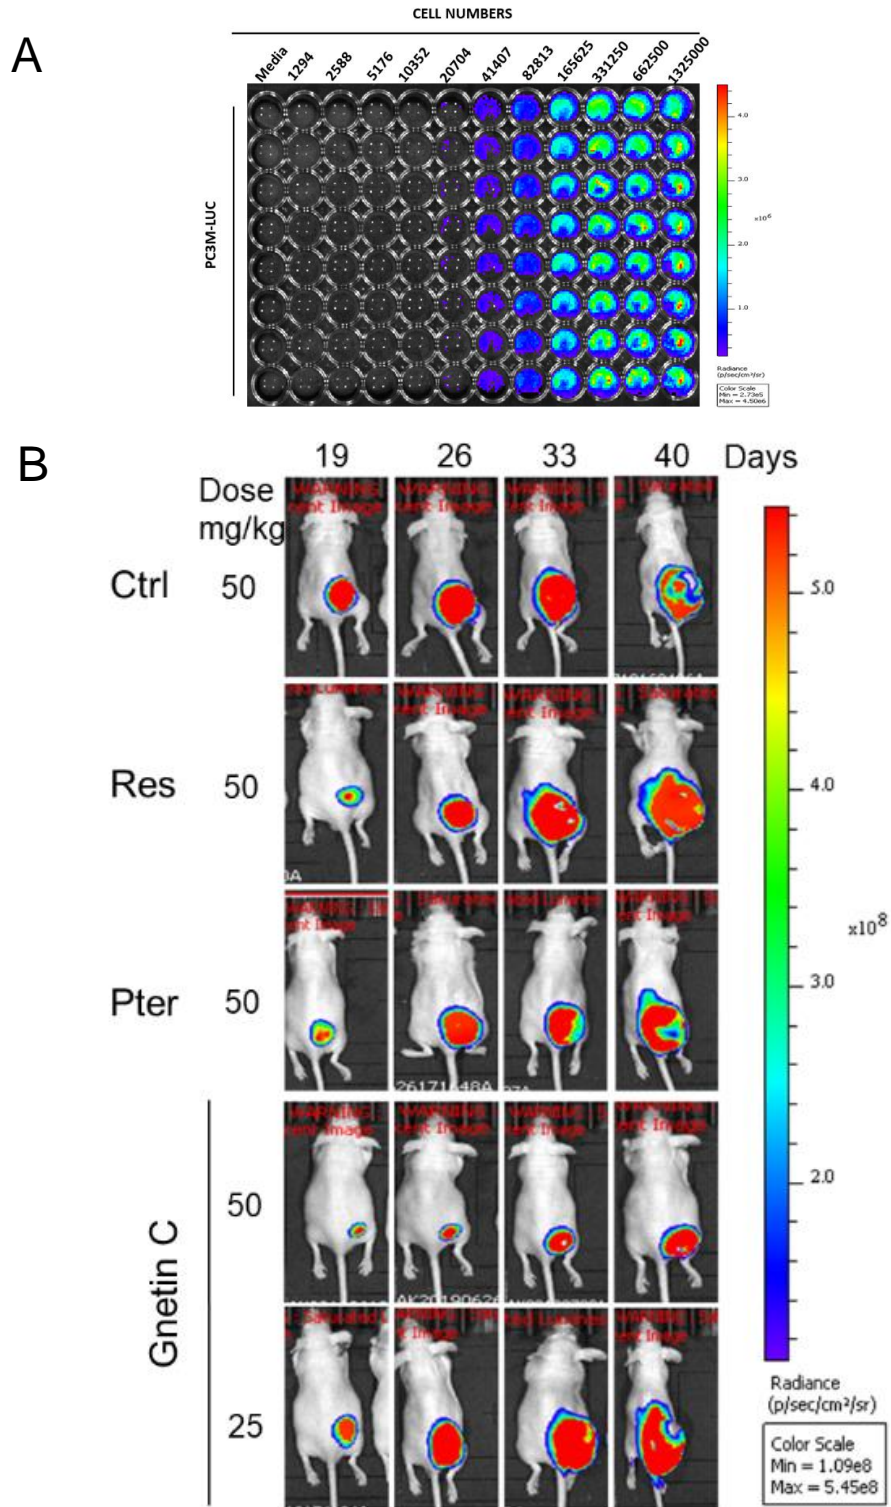

**Figure S1.** (A) Validation of specificity and sensitivity of Luc expression in PC3M-Luc cells *in vitro*. (B) Representative bioluminescent (BL) images of mice bearing PC3M-Luc tumors in each treatment groups are shown from day 19 when treatments began. Images were taken once per week by using IVIS Imaging System. Although Gnetin50 groups shows smallest image, the heterogeneity and saturated signals unable us for satisfactory quantification of differences in BL signals among the groups.

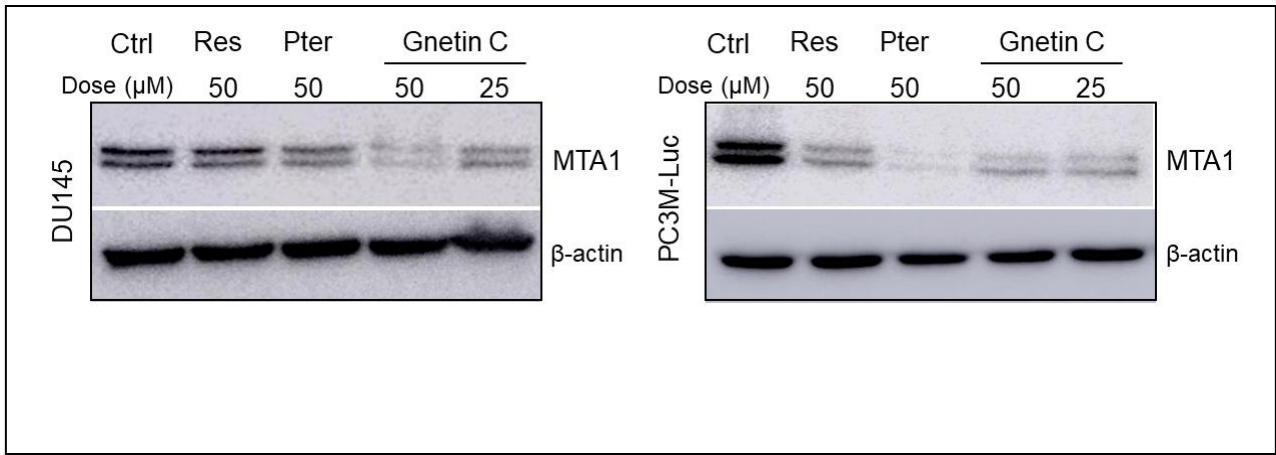

**Figure S2.** Stilbenoid compounds inhibit MTA1 expression in prostate cancer DU145 and PC3M-Luc cells. Gnetin C consistently demonstrated more potent inhibition of MTA1 compared to Res and Pter. Protein levels were assessed by western blot. β-actin was a loading control.

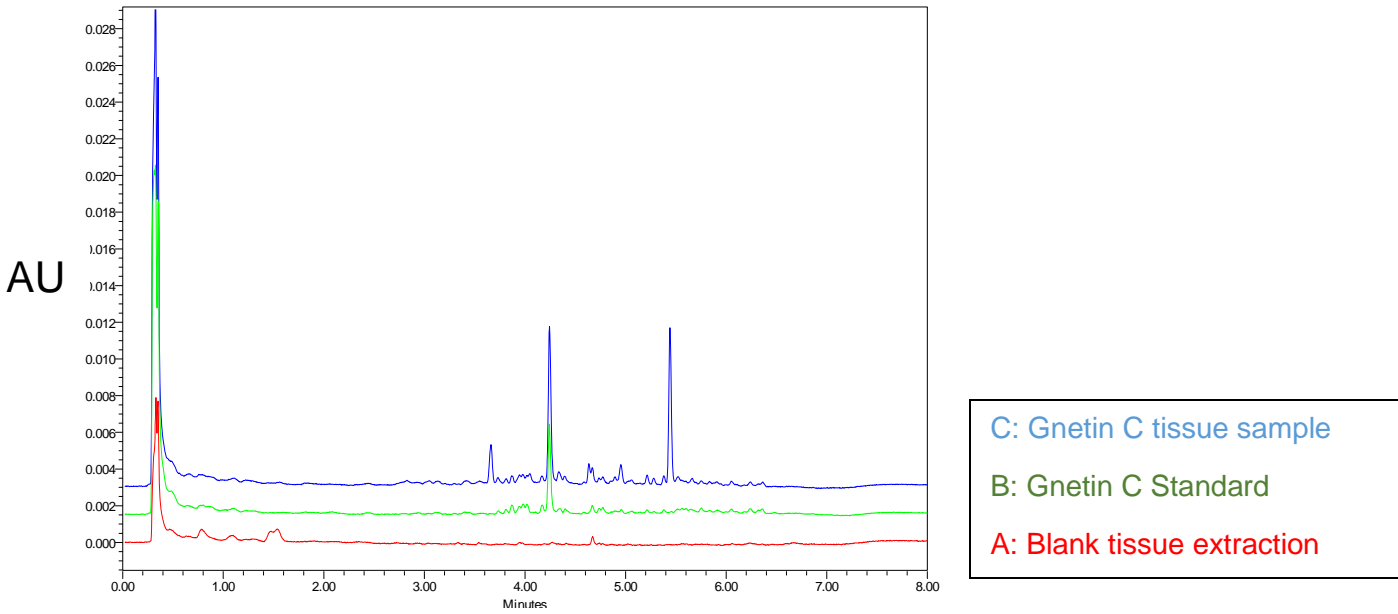

**Figure S3.** The overlaid UPLC chromatograms for A, blank tissue extraction; B, Gnetin C standard, 200 ng/ml; C, Gnetin C, 25 mg tissue sample

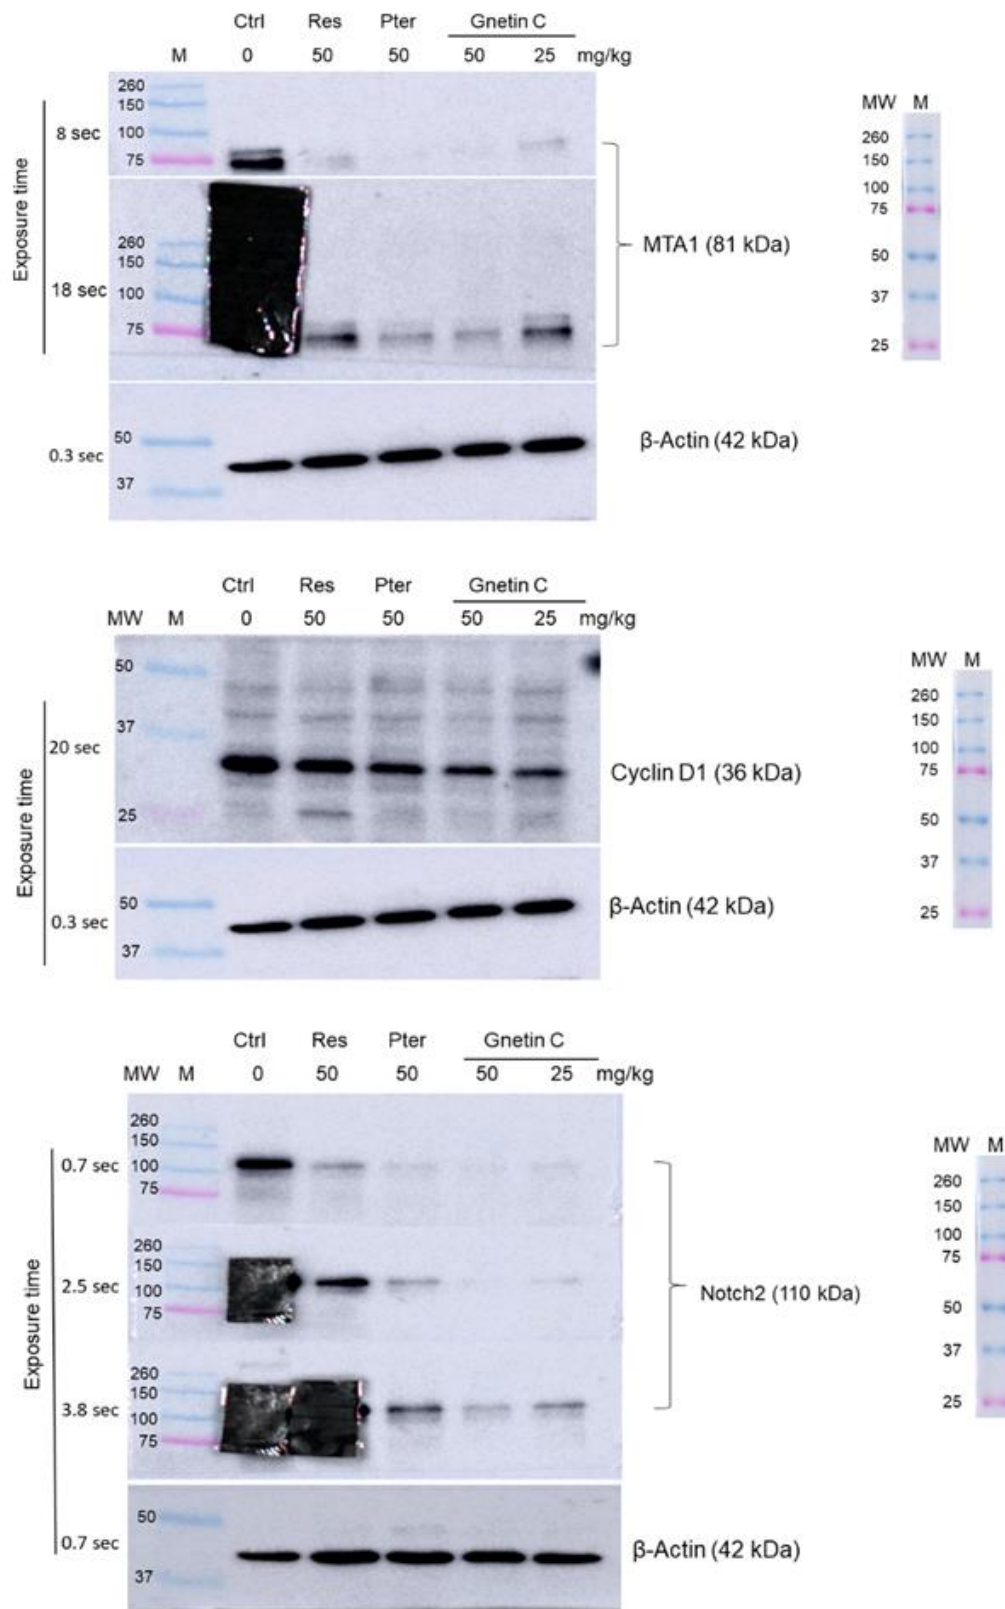

**Figure S4.** Original gels from Figure 6. Short exposure showed signals only for control tumors, in which expression of MTA1 (top gels) and Notch2 (bottom gels) were high. Masking control signals with foil and using longer exposure allowed us to detect lower expression of MTA1 and Notch2, and differences in tumors treated with compounds.

**Table S1.** Primary antibodies used in this study.

| <b>Antibody</b> | <b>Method</b> | <b>Dilution</b> | <b>Source</b>                  | <b>Catalog #</b> |
|-----------------|---------------|-----------------|--------------------------------|------------------|
| MTA1            | Western Blot  | 1: 2500         | Cell Signaling<br>Technologies | 5647             |
|                 | IHC           | 1:50            |                                |                  |
| Cyclin D1       | Western Blot  | 1:1000          | Cell Signaling<br>Technologies | 2922S            |
| Notch2          | Western Blot  | 1:1000          | Cell Signaling<br>Technologies | 57325            |
| $\beta$ -actin  | Western Blot  | 1:2500          | Santa Cruz<br>Biotechnology    | sc-69879         |
| Ki67            | IHC           | 1:50            | Abcam                          | Ab16667          |
| CC3             | IHC           | 1:1000          | Cell Signaling<br>Technologies | 9661S            |
| CD31            | IHC           | 1:500           | Cell Signaling<br>Technologies | 77699            |
